# Supplementary material
Source: publisher site journal article supplement (https://www.dovepress.com/article/347702)
Supplement: Supplementary file 1 [file get_supplementary_file.php]

## Supplementary materials

## Figure S1. Comparison of the similarity between inter group of responders & non- responders, and intra group of responders, of non-responders based on CDR3 sequence


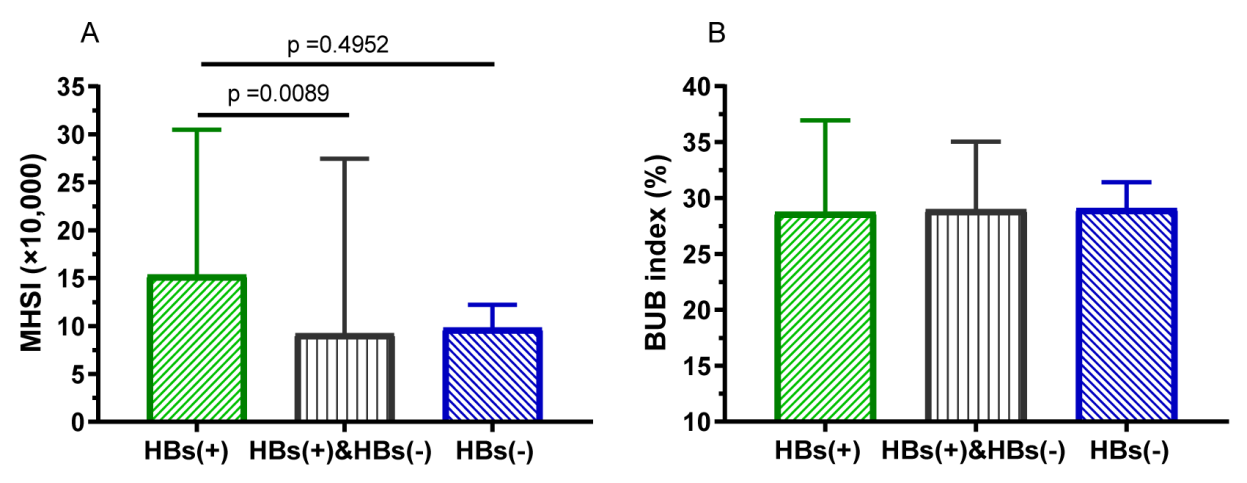


The similarity was measured by Morisita-Horn similarity index (MHSI) (A), and Baroni-Urbani and Buser index (BUB) (B) based on CDR3 amino acid sequences and frequencies. MHSI and BUB index both are used to determine similarities of TR repertoire between samples.

HBs(+), intra group of hepatitis B vaccine responders; HBs(+)&HBs(-), inter group of hepatitis B vaccine responders and non- responders; HBs(-), intra group of non- responders

## Supplementary Table S1. Features of the sequence data

| Groups | Sample | QC-reads a | CDR3 reads | Unique  CDR3 b | Unique CDR3 /CDR3/QC |
| --- | --- | --- | --- | --- | --- |
| Responders | P21 | 5489208 | 4503629 | 48998 | 5.972 |
| P22 | 5377251 | 4361040 | 39885 | 4.918 |
| P23 | 5400321 | 4264028 | 17906 | 2.268 |
| P24 | 5398805 | 4308295 | 48748 | 6.109 |
| P25 | 5284060 | 4170654 | 43900 | 5.562 |
| P26 | 5368931 | 4169280 | 47102 | 6.065 |
| P27 | 5387883 | 4267654 | 46233 | 5.837 |
| P28 | 5322938 | 4114062 | 81725 | 10.574 |
| P29 | 5396620 | 4335160 | 126723 | 15.775 |
| P30 | 5418783 | 4419672 | 69999 | 8.583 |
| P31 | 5431739 | 4285120 | 19706 | 2.498 |
| P32 | 5214145 | 4141868 | 22896 | 2.882 |
| P33 | 5455409 | 4366590 | 25221 | 3.151 |
| P34 | 5522967 | 4340899 | 50776 | 6.460 |
| P35 | 5333027 | 3333773 | 25612 | 4.097 |
| P36 | 5284941 | 3069275 | 22266 | 3.834 |
| P37 | 5498972 | 4336528 | 23496 | 2.979 |
| P38 | 5533547 | 4371941 | 19507 | 2.469 |
| Median |  | 5397712.5 | 4296707.5 | 41892.5 | 5.240 |
| Non-responder | N1 | 5404771 | 4351863 | 43251 | 5.372 |
| N2 | 5506220 | 4425795 | 42764 | 5.320 |
| N3 | 5419281 | 4341850 | 39834 | 4.972 |
| N4 | 5483333 | 4404843 | 38660 | 4.813 |
| N5 | 5668764 | 4646993 | 26086 | 3.182 |
| N6 | 5180271 | 4370317 | 36575 | 4.429 |
| N7 | 4847340 | 3972517 | 24564 | 2.727 |
| N8 | 5052068 | 4294426 | 29269 | 3.061 |
| N9 | 5162870 | 4536960 | 55726 | 6.574 |
| N10 | 5076733 | 4477114 | 42473 | 4.969 |
| Median |  | 5292521 | 4387580 | 39247 | 4.891 |
| *P*-value c |  | 0.1943 | 0.0574 | 0.4535 | 0.2632 |

a QC-reads, the reads (one per clone) is quality control; b Unique CDR3, specific sequence reads of assigned sequence reads that were determined as TCR genes.
c Comparison between hepatitis B vaccine responders and non- responders.

## Supplementary Table S2. V-J combinations with significant different frequency between HepB vaccine responders and non-responders

| V gene | J gene | Responders | Non-responders | *P* (t-test) | *P* (adj) | log2FC |
| --- | --- | --- | --- | --- | --- | --- |
| *TRBV19* | *TRBJ1-1* | 14846.6±837.77 | 11833.55±924.24 | 0.048 | 0.644 | 2.175 |
| *TRBV6-2* | *TRBJ1-6* | 256.9±41.16 | 139.39±9.94 | 0.015 | 0.466 | 2.730 |
| *TRBV6-2* | *TRBJ1-4* | 214.02±22.54 | 122.87±15.17 | 0.005 | 0.380 | 2.649 |
| *TRBV6-2* | *TRBJ2-7* | 1580.37±149.2 | 1117.16±115.63 | 0.035 | 0.620 | 2.348 |
| *TRBV6-5* | *TRBJ1-3* | 1034.74±67.14 | 728.89±97.85 | 0.048 | 0.644 | 2.353 |
| *TRBV6-5* | *TRBJ2-4* | 708.01±48.96 | 509.12±62.94 | 0.048 | 0.644 | 2.324 |
| *TRBV6-5* | *TRBJ1-4* | 1548.3±68.93 | 1216.97±102.54 | 0.042 | 0.638 | 2.195 |
| *TRBV7-3* | *TRBJ1-5* | 94.8±5.62 | 76.35±4.3 | 0.026 | 0.527 | 2.160 |
| *TRBV7-3* | *TRBJ1-2* | 139.58±9.29 | 88.54±5.95 | 0.000 | 0.248 | 2.505 |
| *TRBV7-3* | *TRBJ1-4* | 50.83±2.67 | 38.71±3.43 | 0.031 | 0.586 | 2.241 |
| *TRBV7-4* | *TRBJ1-2* | 148.23±15.56 | 90.03±8.73 | 0.006 | 0.380 | 2.567 |
| *TRBV7-4* | *TRBJ1-4* | 59.45±5.26 | 37.35±4.86 | 0.013 | 0.466 | 2.519 |
| *TRBV25-1* | *TRBJ1-2* | 2341.16±205.56 | 1762.76±57.77 | 0.017 | 0.466 | 2.257 |
| *TRBV29* | *TRBJ2-2* | 10.16±0.87 | 6.18±0.54 | 0.002 | 0.285 | 2.564 |
| *TRBV29* | *TRBJ1-2* | 14.36±1.09 | 9.52±1.43 | 0.037 | 0.633 | 2.441 |
| *TRBV29* | *TRBJ2-3* | 13.67±0.91 | 10.74±0.74 | 0.033 | 0.598 | 2.197 |
| *TRBV6-3* | *TRBJ1-6* | 260.93±42.17 | 142.26±10.94 | 0.016 | 0.466 | 2.723 |
| *TRBV6-3* | *TRBJ1-4* | 220.44±23.07 | 124.62±13.83 | 0.003 | 0.285 | 2.671 |
| *TRBV6-3* | *TRBJ2-7* | 1624.68±153.83 | 1155.32±122.71 | 0.040 | 0.638 | 2.340 |
| *TRBV4-1* | *TRBJ2-5* | 176.81±13.55 | 140.37±8.66 | 0.045 | 0.644 | 2.181 |
| *TRBV4-1* | *TRBJ1-4* | 96.72±7.47 | 73.62±4.55 | 0.021 | 0.500 | 2.242 |
| *TRBV15* | *TRBJ2-5* | 2157.14±392.02 | 855.88±75.6 | 0.005 | 0.380 | 3.182 |
| *TRBV15* | *TRBJ2-7* | 2093.37±253.25 | 1204.39±202.16 | 0.021 | 0.500 | 2.646 |
| *TRBV5-7* | *TRBJ2-2* | 16.91±3.48 | 7±1.12 | 0.017 | 0.466 | 3.119 |
| *TRBV5-7* | *TRBJ1-2* | 18.4±2.73 | 10.33±1.29 | 0.018 | 0.488 | 2.681 |
| *TRBV10-1* | *TRBJ1-2* | 39±7.68 | 9.92±2.81 | 0.003 | 0.285 | 3.824 |
| *TRBV6-1* | *TRBJ1-6* | 949.32±84.95 | 580.1±51.62 | 0.002 | 0.285 | 2.559 |
| *TRBV6-1* | *TRBJ1-2* | 2441.32±193.13 | 1801.72±103.79 | 0.011 | 0.466 | 2.286 |
| *TRBV6-1* | *TRBJ2-4* | 481.21±81.41 | 265.19±25.76 | 0.024 | 0.527 | 2.708 |
| *TRBV4-3* | *TRBJ1-3* | 77.66±15.6 | 34.68±9.82 | 0.040 | 0.638 | 3.011 |
| *TRBV4-3* | *TRBJ1-6* | 114.67±23.05 | 42.7±11.34 | 0.014 | 0.466 | 3.273 |
| *TRBV4-3* | *TRBJ1-1* | 358.48±52.89 | 178.93±23.72 | 0.007 | 0.457 | 2.851 |
| *TRBV4-3* | *TRBJ1-4* | 137.96±26.67 | 53.53±10.84 | 0.010 | 0.466 | 3.214 |
| *TRBV6-7* | *TRBJ1-1* | 13.37±3.03 | 3.67±0.96 | 0.008 | 0.457 | 3.716 |
| *TRBV6-4* | *TRBJ2-5* | 507.68±42.97 | 283.14±60.98 | 0.025 | 0.527 | 2.690 |
| *TRBV6-4* | *TRBJ1-6* | 385.2±63.4 | 177.25±26.59 | 0.009 | 0.460 | 2.968 |
| *TRBV6-4* | *TRBJ1-4* | 194.34±34.95 | 91.41±19.25 | 0.023 | 0.527 | 2.936 |
| *TRBV27* | *TRBJ2-5* | 3210.19±276.98 | 2173.91±79.59 | 0.002 | 0.285 | 2.410 |
| *TRBV27* | *TRBJ1-6* | 2513.34±372.57 | 1558.05±222.78 | 0.050 | 0.644 | 2.538 |
| *TRBV27* | *TRBJ1-2* | 4336.31±331.96 | 3300.17±149.69 | 0.013 | 0.466 | 2.242 |
| *TRBV27* | *TRBJ1-1* | 5426.8±423.33 | 3706.55±494.61 | 0.035 | 0.620 | 2.398 |
| *TRBV27* | *TRBJ1-4* | 1417.8±101.2 | 840.35±129.79 | 0.011 | 0.466 | 2.603 |
| *TRBV27* | *TRBJ2-7* | 9443.67±710.1 | 7149.92±639.72 | 0.043 | 0.638 | 2.249 |
| *TRBV7-2* | *TRBJ1-4* | 1485.39±146.36 | 1026.22±92.69 | 0.021 | 0.500 | 2.382 |
| *TRBV7-9* | *TRBJ2-5* | 9200.33±565.63 | 7307.52±368.42 | 0.016 | 0.466 | 2.180 |
| *TRBV7-9* | *TRBJ1-6* | 2914.36±248.04 | 2091.65±193.51 | 0.026 | 0.527 | 2.327 |
| *TRBV7-9* | *TRBJ1-2* | 8499.87±459.61 | 6337.29±343.25 | 0.003 | 0.285 | 2.272 |
| *TRBV10-3* | *TRBJ2-1* | 1551.9±185.67 | 1109.89±74.87 | 0.046 | 0.644 | 2.332 |
| *TRBV7-8* | *TRBJ1-2* | 4140.99±245.64 | 3116.45±282.06 | 0.030 | 0.577 | 2.258 |
| *TRBV7-8* | *TRBJ1-4* | 2203.65±179.53 | 1615.19±102.8 | 0.014 | 0.466 | 2.296 |
| *TRBV4-2* | *TRBJ2-6* | 94.75±8.14 | 65.28±5.32 | 0.010 | 0.466 | 2.385 |
| *TRBV4-2* | *TRBJ2-3* | 452.69±20.63 | 357.93±25.88 | 0.027 | 0.538 | 2.187 |
| *TRBV4-2* | *TRBJ1-1* | 420.01±27.73 | 317.69±23.37 | 0.019 | 0.488 | 2.251 |
| *TRBV4-2* | *TRBJ1-4* | 145.96±17.61 | 90.75±14.53 | 0.039 | 0.638 | 2.534 |
| *TRBV26* | *TRBJ2-5* | 0.94±0.18 | 0.46±0.11 | 0.042 | 0.638 | 2.875 |
| *TRBV26* | *TRBJ2-4* | 0.3±0.08 | 0±0 | 0.003 | 0.285 | Inf |

The expressing value of V-J combination in each sample is RPM (reads per million), and presented as Mean ± SEM. *P* (adj) is the FDR value corrected by BH (Benjamini–Hochberg) method. The positive number of log2FC indicates an increase expression in hepatitis B (HepB) vaccine responders compared with non-responders.

SEM, standard error of the mean

## Supplementary Table S3. CDR3 motifs in BV7-9, BV27 families from subjects with recombinant hepatitis B vaccine (data online)

| V gene | J gene | CDR3 | Seq. platform | PMID |
| --- | --- | --- | --- | --- |
| *TRBV27* | *TRBJ1-1* | CASSSSFANTEAFF | ABI 373 | 9438196 |
| *TRBV27* | *TRBJ2-5* | CASSLSRVSLNFQETQYF | ABI 373 | 9438196 |
| *TRBV7-9* | *TRBJ2-5* | CASSWGLAGGEETQYF | ABI 373 | 9438196 |
| *TRBV27* | *TRBJ2-2* | CASSPLLNTGELFF | ABI 373 | 9438196 |
| *TRBV27* | *TRBJ2-3* | CASSPRGVPDTQYF | ABI 373 | 9438196 |
